# Supplementary material for: Synergistically constructed polyamine/nanosilica/graphene composites: preparation, features and removal of Hg2+ and dyes from contaminated water
Source: Royal Society of Chemistry journal article supplement (doi:10.1039/c3ra46733c), 2014-01-01
Supplement: c3ra46733c.pdf [file c3ra46733c.pdf]

# Supplementary Information

## **Synergistically constructed polyamine/nanosilica/graphene composites: preparation, features and removal of Hg<sup>2+</sup> and dyes from contaminated water**

Xinling Liu,<sup>1,2</sup> Yanfeng Gao,<sup>1,2,\*</sup> Hongjie Luo<sup>2</sup> and Renhua Jin<sup>3</sup>

<sup>1</sup> School of Materials Science and Engineering, Shanghai University, 99 Shangda Road, Shanghai 200444, China

<sup>2</sup> Shanghai Institute of Ceramics, Chinese Academy of Sciences, 1295 Dingxi Road, Shanghai 200050, China

<sup>3</sup> Department of Material and Life Chemistry, Faculty of Engineering, Kanagawa University, 3-2-7 Rokkakubashi, Yokohama 221-8686, Japan

\*Author for correspondence. Email: [yfgao@shu.edu.cn](mailto:yfgao@shu.edu.cn)(YFG),  
Tel/Fax:+86-21-6990-6218

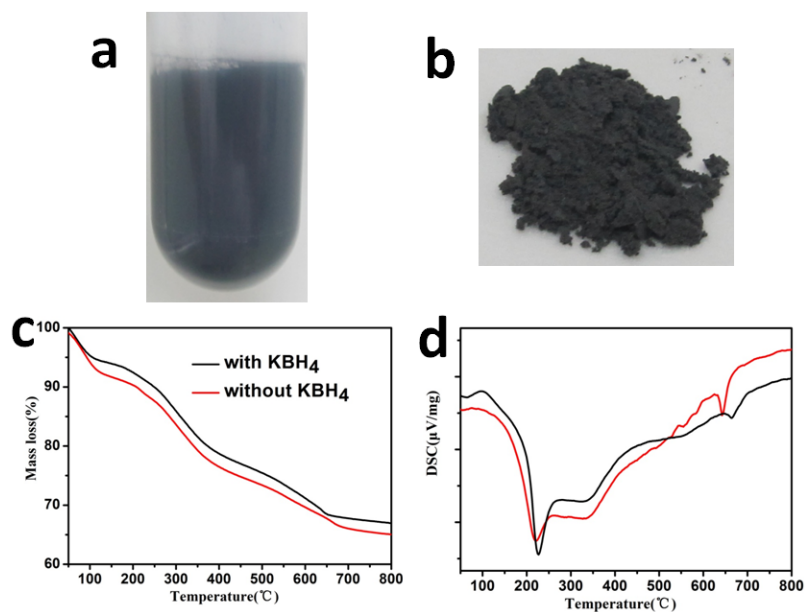

**Figure S1.** Characterizations on the products of PEI@SiO<sub>2</sub>@rGO obtained with  $\text{KBH}_4$  reductant. a) Suspension containing PEI@SiO<sub>2</sub>, GO and  $\text{KBH}_4$  at 90°C. b) Powder of PEI@SiO<sub>2</sub>@rGO. c) TG curves and d) TG curves of PEI@SiO<sub>2</sub>@rGO obtained with (black lines) and without (red lines)  $\text{KBH}_4$ .

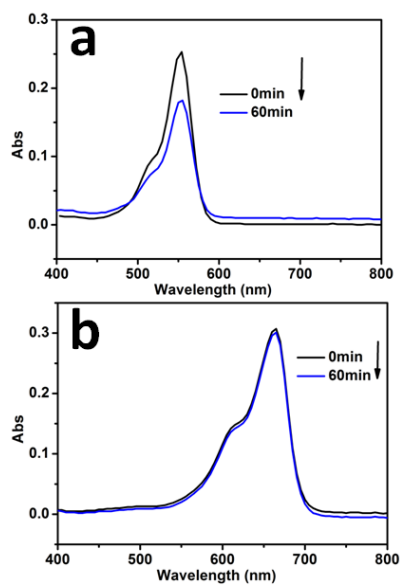

**Figure S2.** Absorption ability of PEI@SiO<sub>2</sub> for organic dyes. a) The time-dependent absorption spectra of a RhB solution after being mixed with PEI@SiO<sub>2</sub>, and b) the time-dependant absorption spectra of MB solution after being mixed with PEI@SiO<sub>2</sub>.
